# Supplementary material
Source: PubMed Central journal article supplement (PMC3262114)
Supplement: NIHMS343377-supplement-1.pdf [file NIHMS343377-supplement-1.pdf]

# **Supplement Material**

## **Arteriolar function in visceral adipose tissue is impaired in human obesity**

Melissa G. Farb PhD, Lisa Ganley-Leal PhD, Melanie Mott, YanMei Liang, Bahadir Ercan PhD,  
Michael E. Widlansky MD, Sherman J. Bigornia MA, Antonino J. Fiscale, Caroline M. Apovian  
MD, Brian Carmine MD, Donald T. Hess MD, Joseph A. Vita MD, Noyan Gokce MD

Supplemental Figure I  
Supplemental Figure II  
Supplemental Figure III  
Supplemental Figure IV  
Supplemental Figure V  
Supplemental Figure VI  
Supplemental Table I

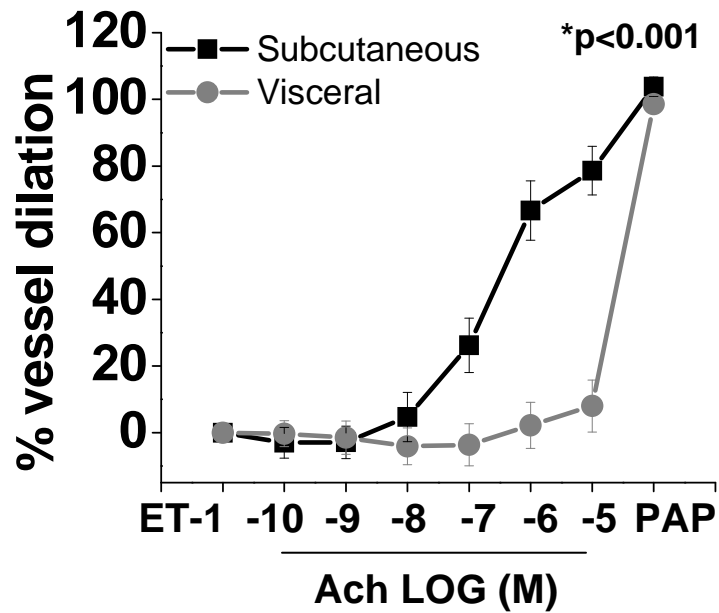

**Supplemental Figure I:** Adipose tissues arteriolar responses, paired data. In a subset of individuals (n=10) that provided paired samples simultaneously from both visceral and subcutaneous depots, endothelium-dependent vasorelaxation of visceral arterioles was severely impaired, similar in magnitude to results for the group as a whole ( $p < 0.001$  by ANOVA). Data presented as mean  $\pm$  SEM.

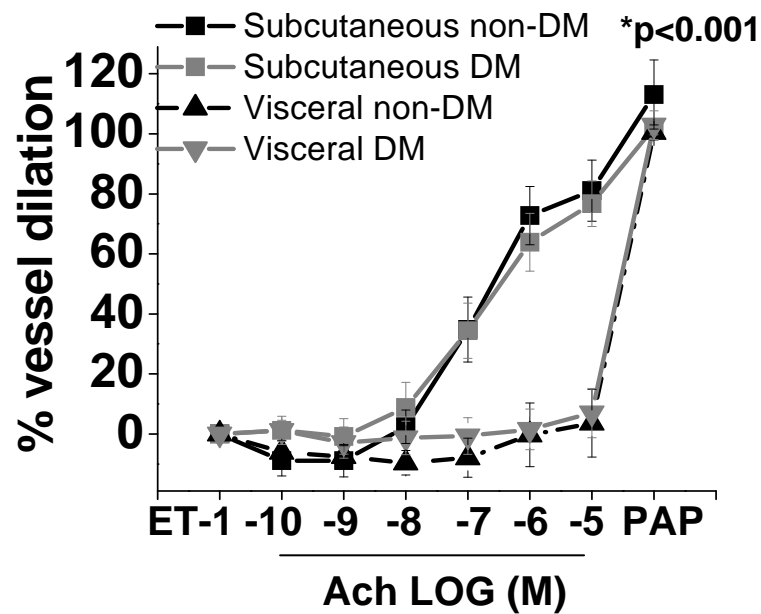

**Supplemental Figure II:** Adipose tissue arteriolar responses in non-diabetic (n=17) versus diabetic subjects (n=13). Visceral microvascular dilation was severely impaired compared to subcutaneous vasorelaxation irrespective of clinical diabetes status ( $p < 0.001$  by ANOVA). Data presented as mean  $\pm$  SEM. DM=diabetes mellitus

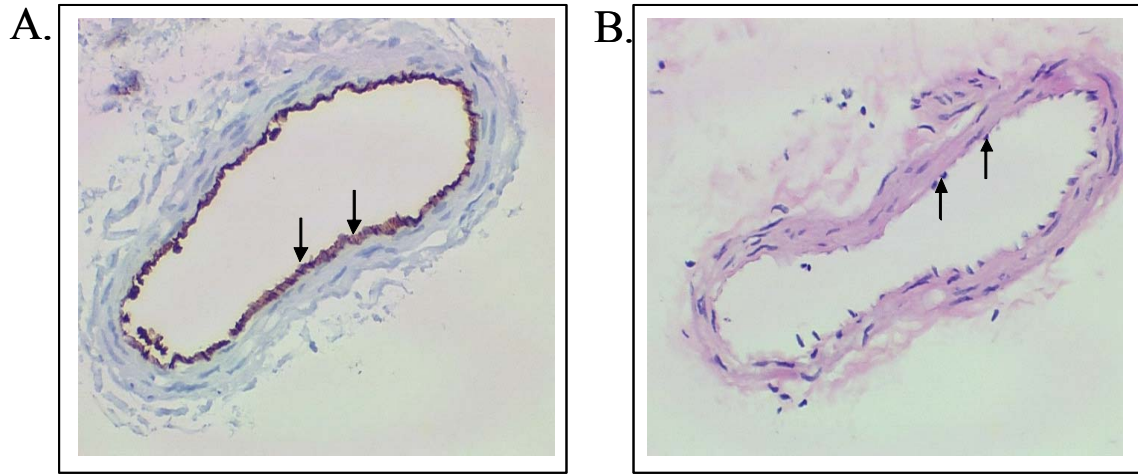

**Supplemental Figure III:** Adipose arteriolar histology. Representative cross-sectional histology of arteriolar staining for (A) endothelium-specific CD31 (B) H&E, demonstrating architecturally intact nucleated endothelium (indicated by arrows) surrounded by smooth muscle layers demonstrating endothelial integrity during experimental conditions.

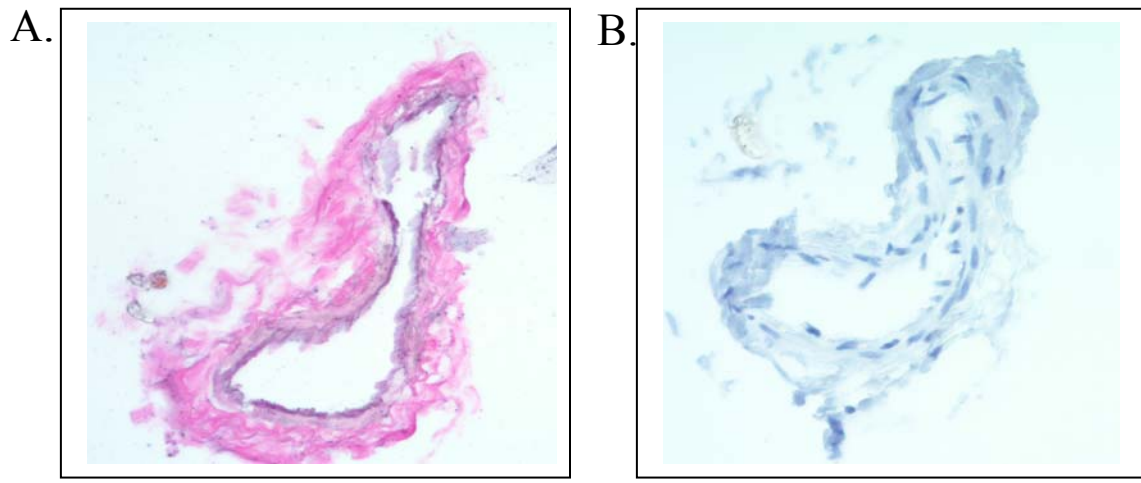

**Supplemental Figure IV:** Representative cross-sectional histology of adipose arterioles stained for (A) elastica-van Gieson, and (B) CD68, demonstrating no evidence of atherosclerotic changes or vascular macrophage infiltration, respectively.

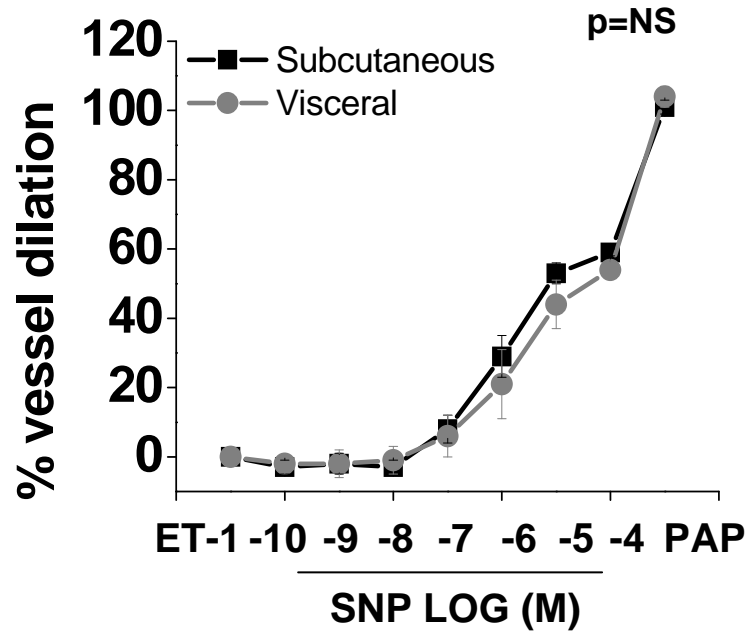

**Supplemental Figure V:** Adipose tissues arteriolar responses to sodium nitroprusside (SNP). No difference in endothelium-independent, SNP-mediated vasodilation was observed between visceral as compared to subcutaneous adipose arterioles. (n=6, p=0.5 by ANOVA). Data presented as mean  $\pm$  SEM.

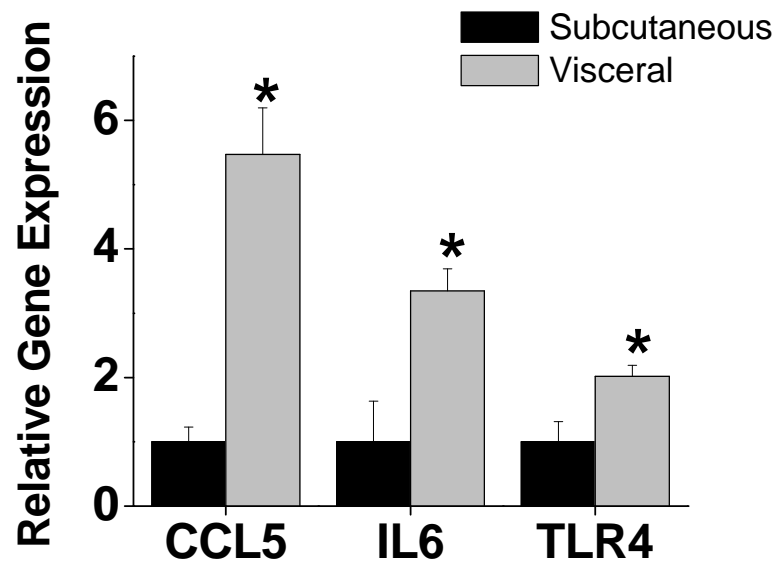

**Supplemental Figure VI:** Vascular endothelial cell populations isolated from visceral fat exhibited higher expression of inflammatory cytokines as compared to the subcutaneous depot (n=6). Data are presented as fold difference in visceral compared to subcutaneous expression  $\pm$  SEM. \*  $p < 0.05$ .

**Supplemental Table I:** Gene expression in visceral compared to subcutaneous adipose tissue, paired samples.

|                                      | Gene           | Fold difference<br>in visceral<br>compared to<br>subcutaneous fat | p value |
|--------------------------------------|----------------|-------------------------------------------------------------------|---------|
| Immune cells markers                 | CD3            | 7.2                                                               | 0.001*  |
|                                      | CD4            | 10.0                                                              | 0.059   |
|                                      | CD8            | 20.7                                                              | 0.004*  |
|                                      | CD68           | 1.7                                                               | 0.192   |
|                                      | CD163          | 2.9                                                               | 0.092   |
|                                      | FOXP3          | 1.8                                                               | 0.576   |
| Inflammation and oxidative stress    | Adiponectin    | 0.5                                                               | 0.503   |
|                                      | CCL2           | 1.2                                                               | 0.773   |
|                                      | CCL5           | 10.6                                                              | 0.006*  |
|                                      | CCR2           | 3.8                                                               | 0.306   |
|                                      | FSTL1          | 3.5                                                               | 0.132   |
|                                      | IFN- $\gamma$  | 1.1                                                               | 0.980   |
|                                      | ICAM-1         | 1.8                                                               | 0.395   |
|                                      | IL-1 $\beta$   | 4.7                                                               | 0.240   |
|                                      | IL-6           | 7.6                                                               | 0.040*  |
|                                      | IL-10          | 1.8                                                               | 0.232   |
|                                      | MYD88          | 2.1                                                               | 0.150   |
|                                      | NF- $\kappa$ B | 2.2                                                               | 0.008*  |
|                                      | NOX1           | 1.6                                                               | 0.090   |
|                                      | NOX4           | 1.3                                                               | 0.650   |
|                                      | TGF- $\beta$   | 3.9                                                               | 0.054   |
|                                      | TLR4           | 1.9                                                               | 0.160   |
|                                      | TNF- $\alpha$  | 4.4                                                               | 0.213   |
|                                      | VCAM-1         | 1.4                                                               | 0.459   |
|                                      | eNOS           | 0.8                                                               | 0.588   |
| Angiogenic and hypoxia-related genes | ANGPT2         | 3.5                                                               | 0.109   |
|                                      | HIF1- $\alpha$ | 2.3                                                               | 0.108   |
|                                      | VEGF           | 2.8                                                               | 0.002*  |
